# Supplementary material
Source: PubMed Central journal article supplement (PMC4776030)
Supplement: mmc1.pdf [file mmc1.pdf]

**Biophysical Journal, Volume 110**

**Supplemental Information**

**Variations in Fusion Pore Formation in Cholesterol-Treated Platelets**

**Solaire A. Finkenstaedt-Quinn, Sarah M. Gruba, and Christy L. Haynes**

Supporting material for: Variations in Fusion Pore Formation in Cholesterol-Treated Platelets

S.A. Finkenstaedt-Quinn\*, S.M. Gruba\*, C.L. Haynes

\*These authors have contributed equally

Department of Chemistry, University of Minnesota 207 Pleasant St. SE Minneapolis, MN 55455, USA

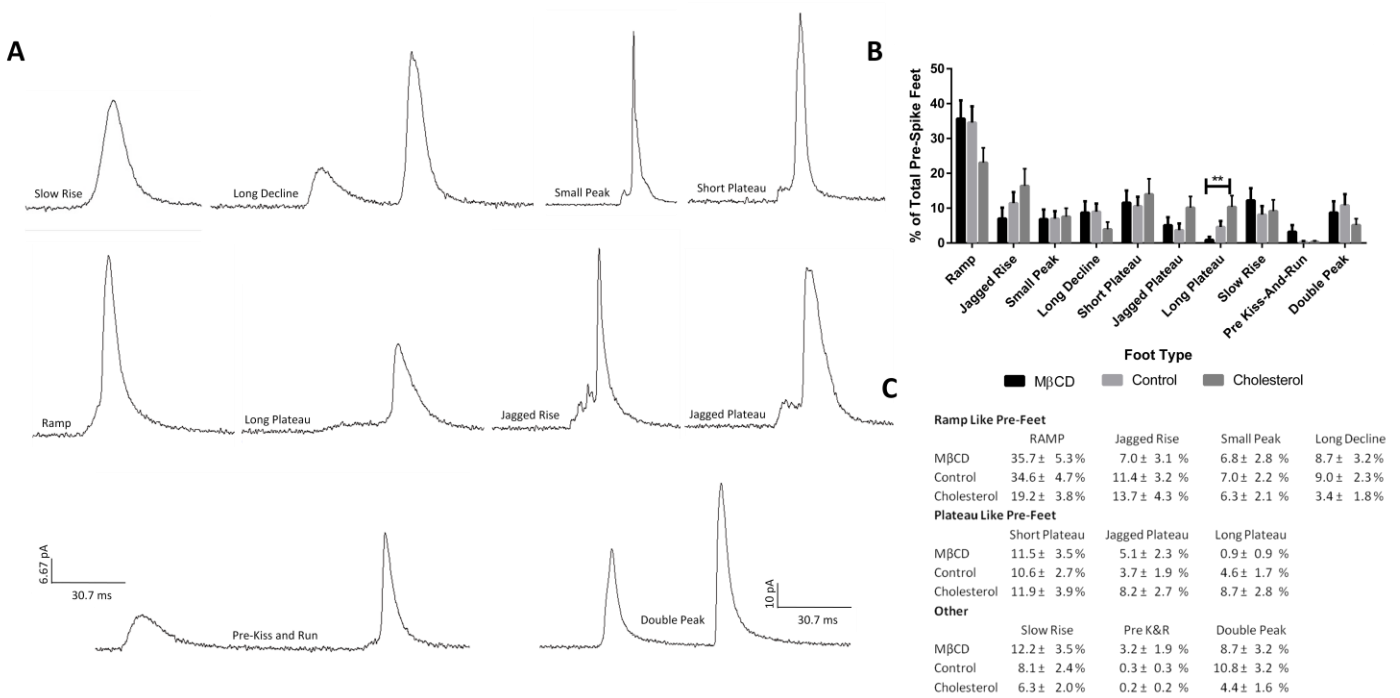

Supplemental 1: Representations of the various pre-spike feet types. The representative traces are all on the same current and time scale excluding the double peak (A). Percent of total pre-spike feet with varying cholesterol concentrations (B,C). \*\* $p \leq 0.01$

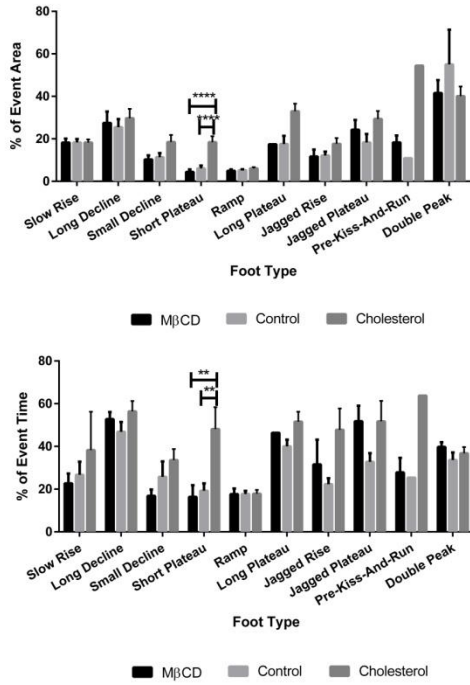

Supplemental 2: Percent of event area (A) and percent of time the foot feature took up relative to the time of the whole event (B) for pre-spike feet. \*\* $p \leq 0.01$ , \*\*\*\* $p \leq 0.0001$

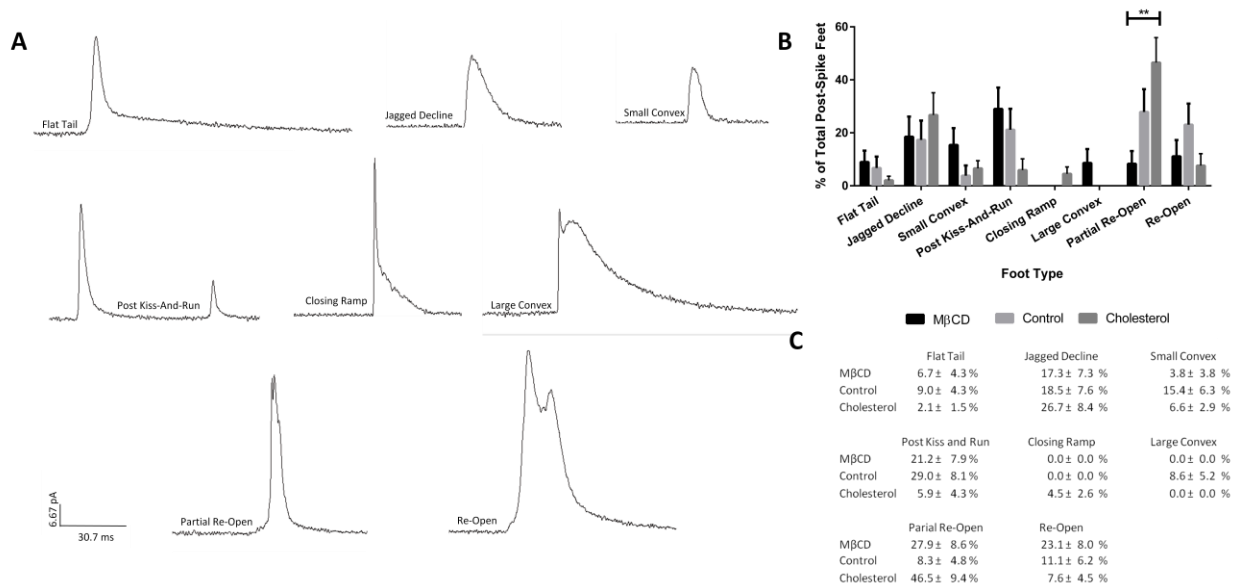

Supplemental 3: Representations of the various post spike feet. The representative traces are all on the same current and time scale. (A) Percent of total pre-spike feet with varying cholesterol concentrations (B,C). \*\* $p \leq 0.01$

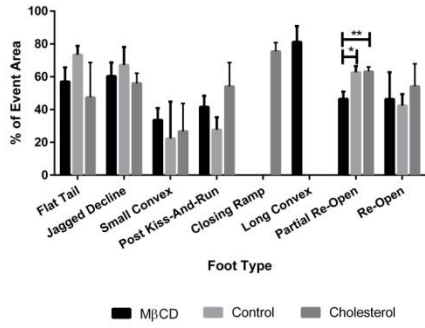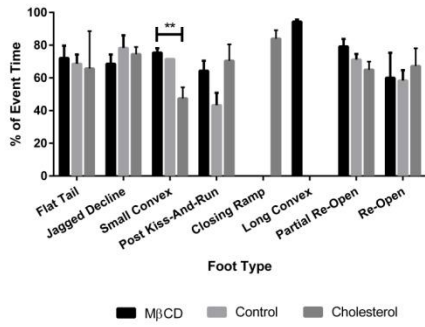

Supplemental 4: Percent of event area (A) and percent of time the foot feature took up relative to the time of the whole event (B) for post spike feet. \* $p \leq 0.05$ , \*\* $p \leq 0.01$

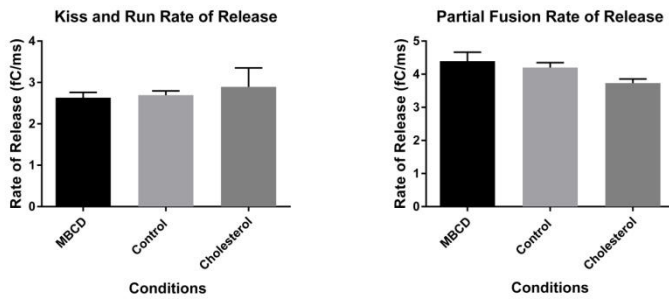

Supplemental 5: Rate of release for kiss and run events (A) and partial fusion events (B).
